# Supplementary material for: Construction of supramolecular laccase enzymes and understanding of catalytic dye degradation using multispectral and molecular docking approaches
Source: Royal Society of Chemistry journal article supplement (doi:10.1039/d1re00111f), 2021-01-01

## Electronic supplementary information

# Construction of Supramolecular Laccase Enzymes and Understanding of Catalytic Dye Degradation Using Multispectral and Molecular Docking Approaches

*Qingteng Zhou<sup>1</sup>, Ming Guo<sup>\*,2</sup>, Kaijie Ni<sup>2</sup>, Francesca M. Kerton<sup>\*,3</sup>*

<sup>1</sup> College of Engineering, Zhejiang A&F University, Hangzhou, Zhejiang 311300,  
China

<sup>2</sup> College of Science, Zhejiang A&F University, Hangzhou, Zhejiang 311300, China

<sup>3</sup> Department of Chemistry, Memorial University, St. John's, NL, Canada A1B 3X7

### **\* Corresponding authors**

E-mail: guoming@zafu.edu.cn (M. Guo)

E-mail: fkerton@mun.ca (F. M. Kerton)

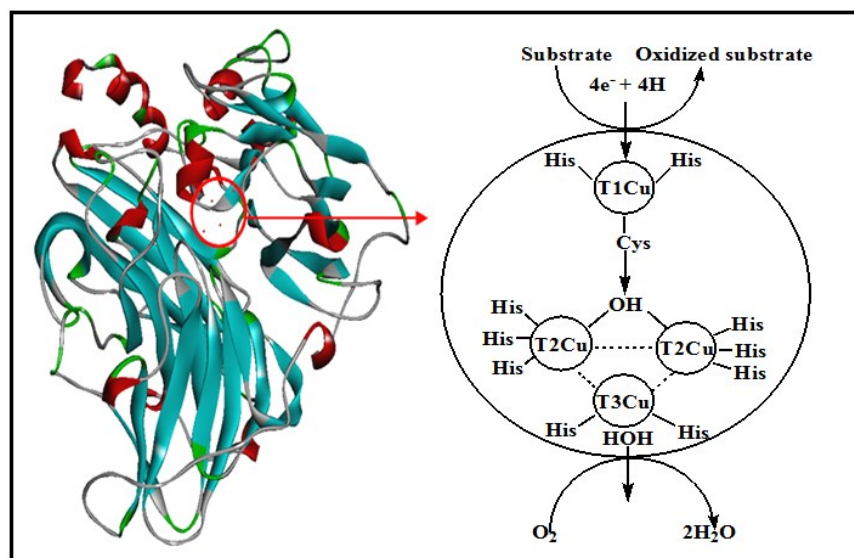

**Fig. S1** Catalytic oxidation mechanism of the laccase active site

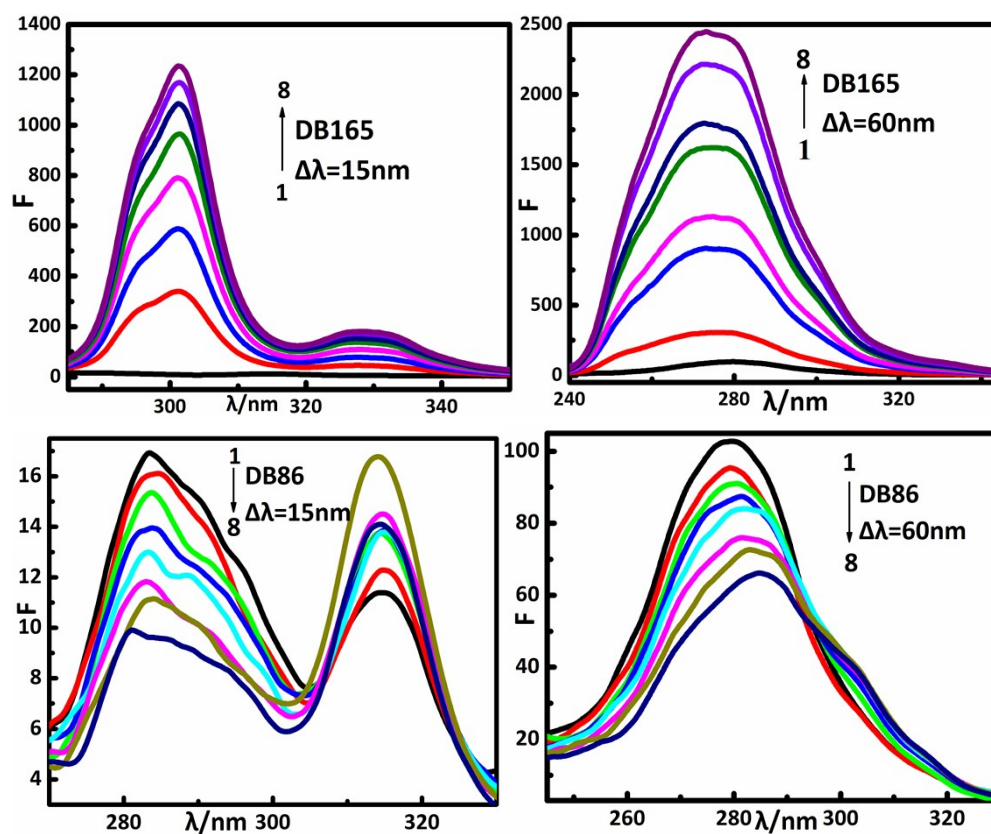

**Fig. S2** DB165 and DB86 molecular synchronous fluorescence spectrum with SL-DSA ( $\Delta\lambda=15$  nm,  $\Delta\lambda=60$  nm), [ $C_{\text{Dyes}} = C_{\text{LAC}} = 1.0 \times 10^{-5}$  M,  $T=298\text{K}$ ,  $\text{pH}=4.5$ ]

## References

- [S1] L. Shen, Z. Jin, W. Xu, X. Jiang, Y. Shen, Y. Wang, Y. Lu, Enhanced treatment of anionic and cationic dyes in wastewater through live bacteria encapsulation using graphene hydrogel, *Ind. Eng. Chem. Res.* 2019, **58**, 7817 - 7824.
- [S2] D. Singh, K. K. Sharma, S. Jacob, S. K. Gakhar, Molecular Docking of Laccase Protein from *Bacillus Safensis* DSKK5 Isolated from Earthworm Gut: A Novel Method to Study Dye Decolorization Potential, *Water Air Soil Pollut.*, 2014, **225**, 2175.
- [S3] G. McMullan, C. Meehan, A. Conneely, N. Kirby, T. Robinson, P. Nigam, I. M. Banat, R. Merchant, W. F. Smyth, Microbial decolorization and degradation of textile dyes. *Appl. Microbiol. Biotechnol.* 2001, **56**, 81-87.
- [S4] M. Chivukula, V. Renganathan, Phenolic azo dye oxidation by laccase from *Pyricularia oryzae*. *Appl. Environ. Microbiol.*, 1995, **61**, 4347-4377.

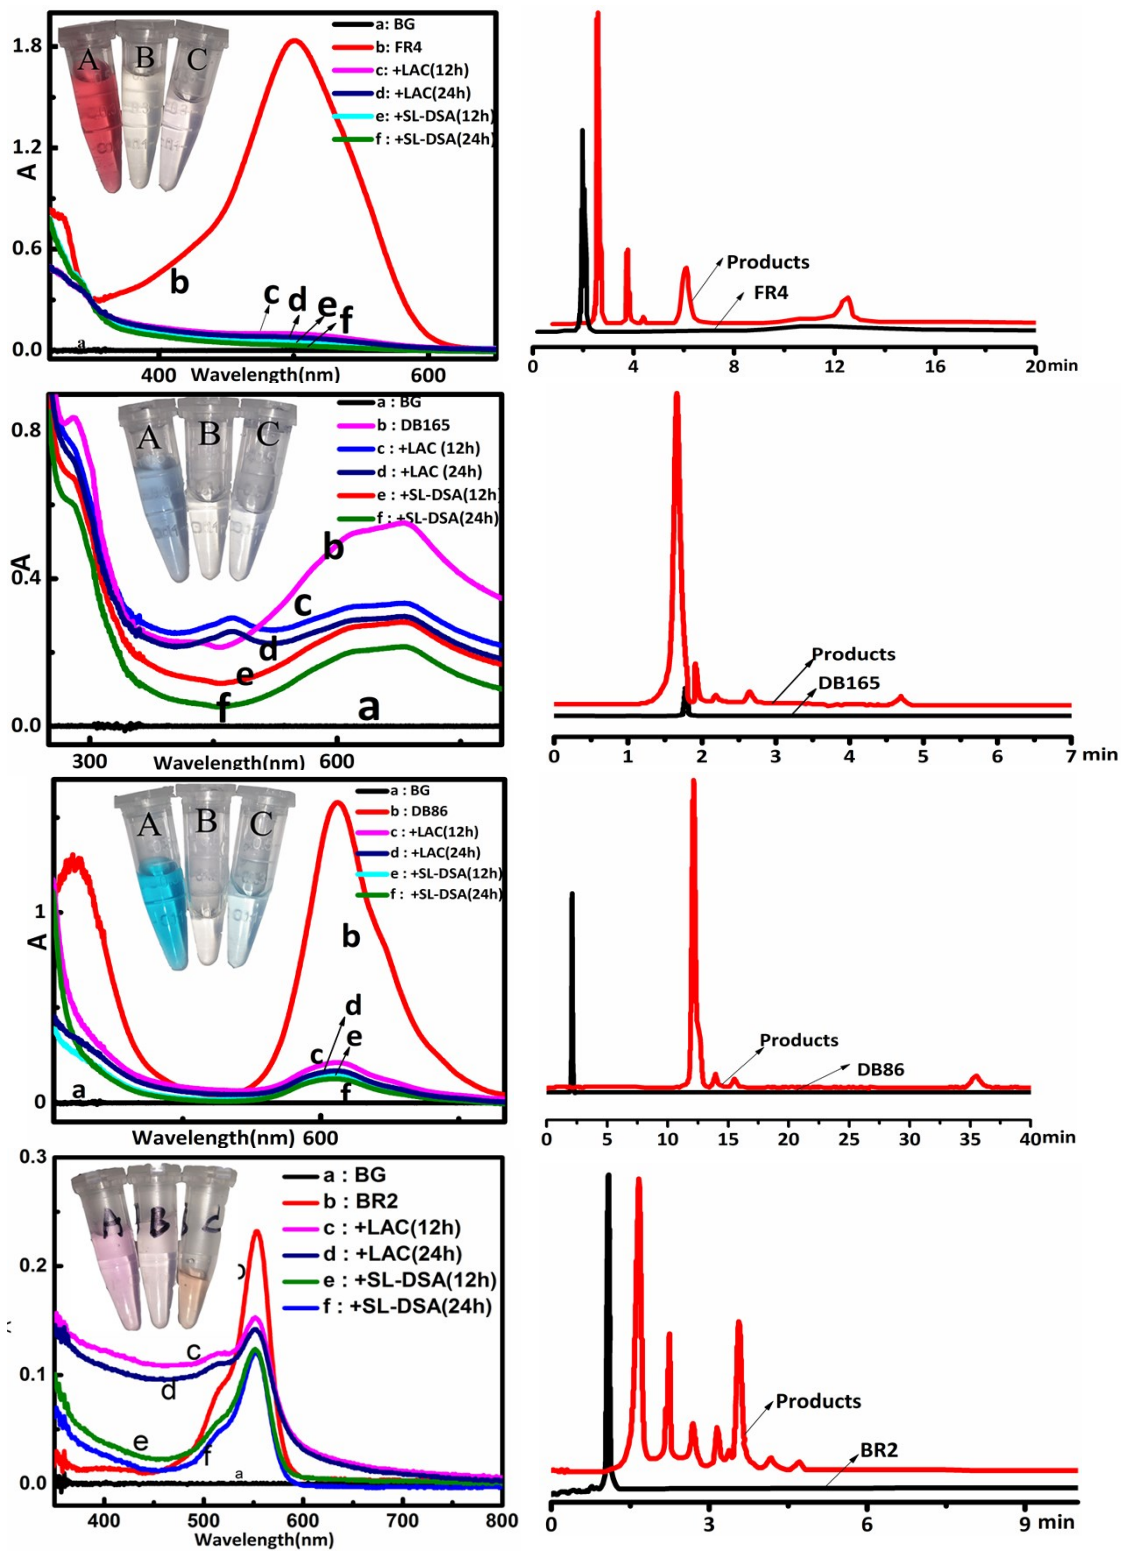

**Fig. S3** Comparison of chromaticity, UV spectrum and HPLC before and after decolorization of dyes

**Table S1** Chemical information and structural characteristics of the 13 kinds of dyes

| Name of 13 dyes                                         | Chemical characteristics                                                                                                                                         | Category | Chemical structure of dyes |
|---------------------------------------------------------|------------------------------------------------------------------------------------------------------------------------------------------------------------------|----------|----------------------------|
| 1. Azoic Diazo C<br>omponent 7 (ADC<br>7), CAS: 99-09-2 | MF: C <sub>6</sub> H <sub>6</sub> N <sub>2</sub> O <sub>2</sub><br>MW: 138.12 g.mol <sup>-1</sup><br>$\lambda_{\max}$ : 375 nm                                   | Monoazo  |                            |
| 2. Mordant Orang<br>el (MO1) CAS: 2<br>243-76-7         | MF: C <sub>13</sub> H <sub>8</sub> N <sub>3</sub> Na O <sub>5</sub><br>MW: 309.21 g.mol <sup>-1</sup><br>$\lambda_{\max}$ : 385 nm                               | Monoazo  |                            |
| 3. Disperse Blue<br>165 (DB165), CA<br>S: 41642-51-7    | MF: C <sub>20</sub> H <sub>19</sub> N <sub>7</sub> O <sub>3</sub><br>MW: 405.41 g.mol <sup>-1</sup><br>$\lambda_{\max}$ : 694 nm                                 | Monoazo  |                            |
| 4. Acid Orange 7<br>(AO7), CAS: 633-<br>96-5            | MF: C <sub>16</sub> H <sub>11</sub> N <sub>2</sub> NaO <sub>4</sub> S<br>MW: 350.33 g.mol <sup>-1</sup><br>$\lambda_{\max}$ : 498 nm                             | Monoazo  |                            |
| 5. Food Red 4 (F<br>R4), CAS: 2302-9<br>6-7             | MF: C <sub>20</sub> H <sub>12</sub> N <sub>2</sub> Na <sub>2</sub> O <sub>7</sub> S <sub>2</sub><br>MW: 502.43 g.mol <sup>-1</sup><br>$\lambda_{\max}$ : 500 nm  | Monoazo  |                            |
| 6. Direct Red 28<br>(DR28), CAS: 573-<br>58-0           | MF: C <sub>32</sub> H <sub>22</sub> N <sub>6</sub> Na <sub>2</sub> O <sub>6</sub> S <sub>2</sub><br>MW: 696.67 g.mol <sup>-1</sup><br>$\lambda_{\max}$ : 497 nm  | Bisazo   |                            |
| 7. Direct Orange<br>26(DO26), CAS: 3<br>626-36-6        | MF: C <sub>33</sub> H <sub>20</sub> N <sub>6</sub> Na <sub>4</sub> O <sub>15</sub> S <sub>4</sub><br>MW: 960.55 g.mol <sup>-1</sup><br>$\lambda_{\max}$ : 496 nm | Bisazo   |                            |

|                                            |                                                                                                 |                |                                                                                       |
|--------------------------------------------|-------------------------------------------------------------------------------------------------|----------------|---------------------------------------------------------------------------------------|
| 8. Disperse Red 60 (DR60), CAS: 12223-37-9 | MF: $C_{20}H_{13}NO_4$<br>MW: 331.32 g.mol <sup>-1</sup><br>$\lambda_{max}$ : 520 nm            | Anthraquinone  | 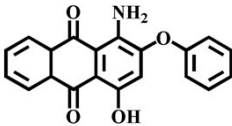   |
| 9. Acid Blue 90 (AB90), CAS: 6104-58-1     | MF: $C_{45}H_{44}N_3NaO_7S_2$<br>MW: 825.97 g.mol <sup>-1</sup><br>$\lambda_{max}$ : 595 nm     | Triarylmethane |     |
| 10. Vat Blue 1 (V B1), CAS: 482-89-3       | MF: $C_{16}H_{10}N_2O_2$<br>MW: 262.26 g.mol <sup>-1</sup><br>$\lambda_{max}$ : 715 nm          | Indigo         |    |
| 11. Basic Blue 9 (BB9), CAS: 61-73-4       | MF: $C_{16}H_{18}ClN_3S$<br>MW: 319.85 g.mol <sup>-1</sup><br>$\lambda_{max}$ : 664 nm          | Sulfide dyes   |   |
| 12. Direct Blue 86 (DB86), CAS: 1330-38-7  | MF: $C_{34}H_{16}CuN_8Na_2O_6S_2$<br>MW: 982.18 g.mol <sup>-1</sup><br>$\lambda_{max}$ : 616 nm | Phthalocyanine |  |
| 13. Basic Red 2 (BR2), CAS: 477-73-6       | MF: $C_{20}H_{19}ClN_4$<br>MW: 350.84g.mol <sup>-1</sup><br>$\lambda_{max}$ : 563 nm            | Heterocyclic   |  |

**Table S2** Calculation results of combined distance

| <b>Dyes</b> | <b>J(cm<sup>3</sup>·L / mol )</b> | <b>E</b> | <b>R<sub>0</sub>/nm</b> | <b>r/nm</b> |
|-------------|-----------------------------------|----------|-------------------------|-------------|
| DB86        | 8.27×10 <sup>-16</sup>            | 0.6877   | 1.62                    | 1.42        |
| FR4         | 1.53×10 <sup>-16</sup>            | 0.6512   | 1.22                    | 1.10        |
| AB90        | 1.24×10 <sup>-16</sup>            | 0.5902   | 2.54                    | 2.39        |
| BB9         | 3.06×10 <sup>-14</sup>            | 0.7605   | 2.95                    | 2.44        |
| DO26        | 7.03×10 <sup>-16</sup>            | 0.4444   | 1.58                    | 1.63        |

**Table S3** The internal effective binding molecular model of the SL-DSA decolorization reaction system for the other 11 kinds of dyes

| Dyes | Docking score kJ/mol | Amino acid residues that interact with chromophore                                                              | $\pi$ - $\pi$ stacking                                                | Unfavorable                                     |
|------|----------------------|-----------------------------------------------------------------------------------------------------------------|-----------------------------------------------------------------------|-------------------------------------------------|
| DR28 | -79.48               | Interaction between Asp206\Phe457 and the -N=N- bond and sulfosulfide atoms of DR28                             | Phe265\Phe457\Pro163<br>Pro394\Ala240\Pro396<br>Ile455 \Arg161\Ala461 | Phe162\His458\<br>Phe239                        |
| AB90 | -93.20               | Interaction between Asp456\His111\<br>Phe344\Glu460 and the -C=N-\-C=C-<br>bonds and sulfosulfide atoms of AB90 | His454\Ala80\Phe344\Asp<br>456\Ser113\His398\His400<br>\Leu459 \His66 | His64\Cu1501\<br>Cu1500\Pro346\<br>Thr114\Val82 |
| DO26 | -12.10               | Interaction between Phe344\Ala80\<br>His111\Gly159\Ser343 and the -N=N-<br>bond, sulfosulfide atoms of DO26     | Glu460\ Val82\<br>Pro346\Arg157\<br>Ala156\Arg161                     | Ser113\Phe457\<br>Leu459                        |
| DR60 | -8.03                | Interaction between Phe344\Leu459\Gl<br>y462 and the aniline group, phenolic<br>hydroxyl group atom of DR60     | Glu460\Pro346                                                         | Gly462\Arg161\<br>Arg157                        |
| FR4  | -8.32                | Interaction between Pro346\Arg161 and<br>the -N=N- bond of FR4                                                  | Phe162\Pro391\Phe332                                                  | Nothing                                         |
| ADC7 | -5.79                | Interaction between Leu459\Phe344 an<br>d the benzene amino of ADC7                                             | Pro346                                                                | Nothing                                         |
| MO1  | -7.25                | Interaction between Glu460\Leu459\<br>Arg161 and the -N=N- bond of MO1                                          | Leu459\Pro346\His111                                                  | Nothing                                         |
| AO7  | -7.20                | Interaction between Glu460\Arg161 and<br>the -N=N- bond of AO7                                                  | Thr345\Pro346\Phe344\<br>Arg157                                       | Nothing                                         |
| BB9  | -5.80                | Interaction of Phe265\Asp206 with<br>aromatic ring -C-N- bond of BB9                                            | Phe162                                                                | Nothing                                         |



|     |       |                                                                           |                     |         |
|-----|-------|---------------------------------------------------------------------------|---------------------|---------|
| VB1 | -7.11 | Interaction of Pro346\Glu460\Arg161<br>with the -C=N- bond of VB1         | Leu459\Ala80\Ser113 | Nothing |
| BR2 | -4.66 | Interaction of Phe162\Phe344\Glu460\<br>Pro346 with the -C=N- bond of BR2 | Glu460\Arg161       | Nothing |

**Table S4** The expected structure of the degradation products of the other 10 dyes

| Dyes  | Original dye structure                                                              | Prediction of degradation products                                                   |
|-------|-------------------------------------------------------------------------------------|--------------------------------------------------------------------------------------|
| ADC7  | 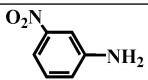   | H <sub>2</sub> O                                                                     |
| MO1   |    |    |
| DB165 |    |    |
| AO7   |    |    |
| FR4   |   |   |
| BR2   |  |  |
| DR60  |  |  |
| VB1   |  |  |
| BB9   |  |  |

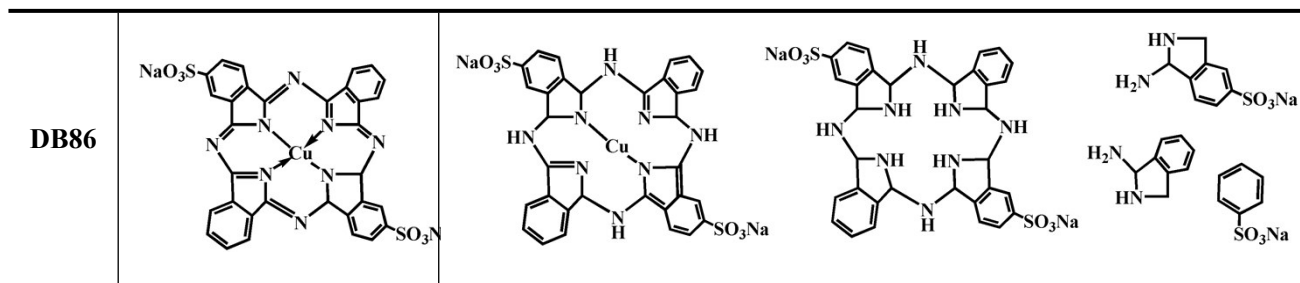

Supplement: d1re00111f1.pdf [file d1re00111f1.pdf]
